# Supplementary figures and images for: Biological and technical factors in the assessment of blood-based tumor mutational burden (bTMB) in patients with NSCLC
Source: PubMed Central journal article supplement — J Immunother Cancer. 2022 Feb 25;10(2):e004064. doi: 10.1136/jitc-2021-004064 (PMC8883268; doi:10.1136/jitc-2021-004064), 2022-02-25

A

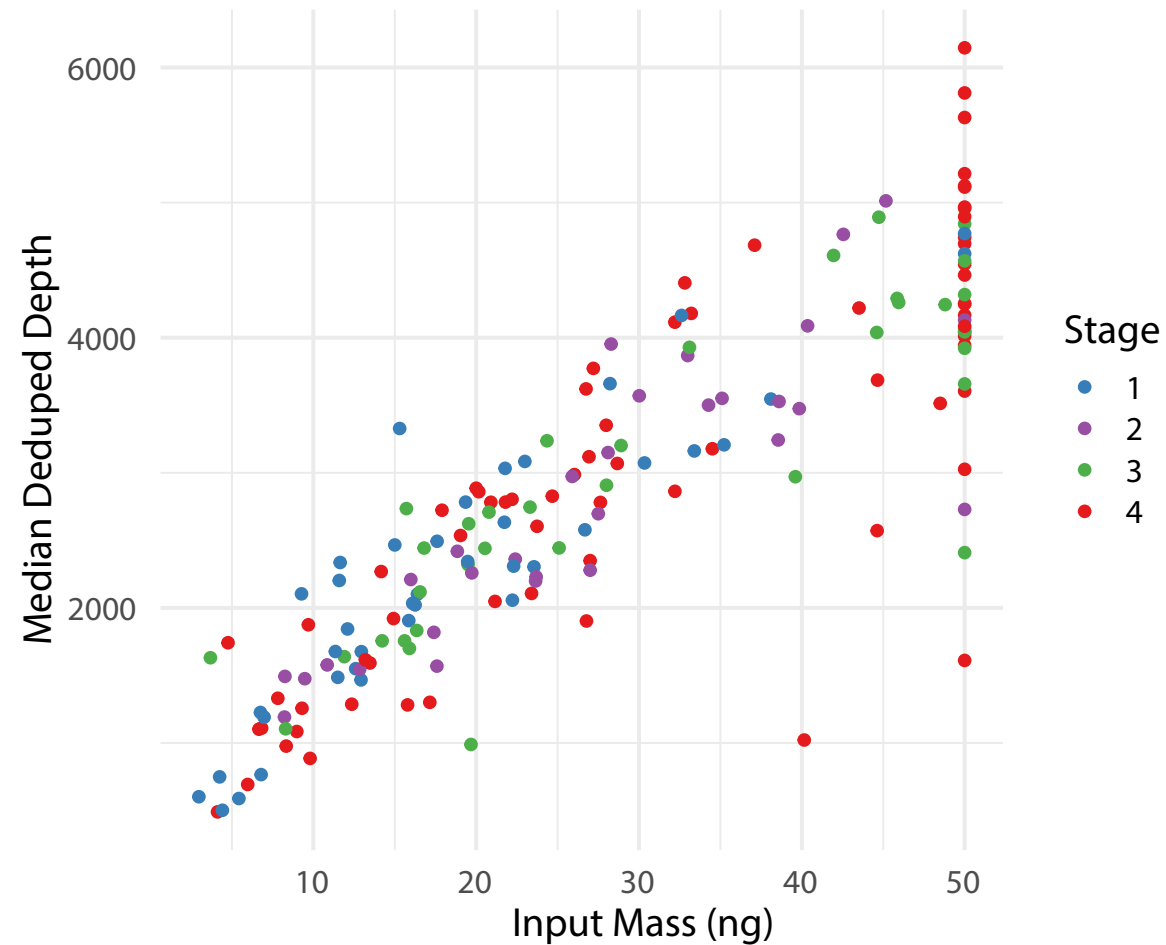

B

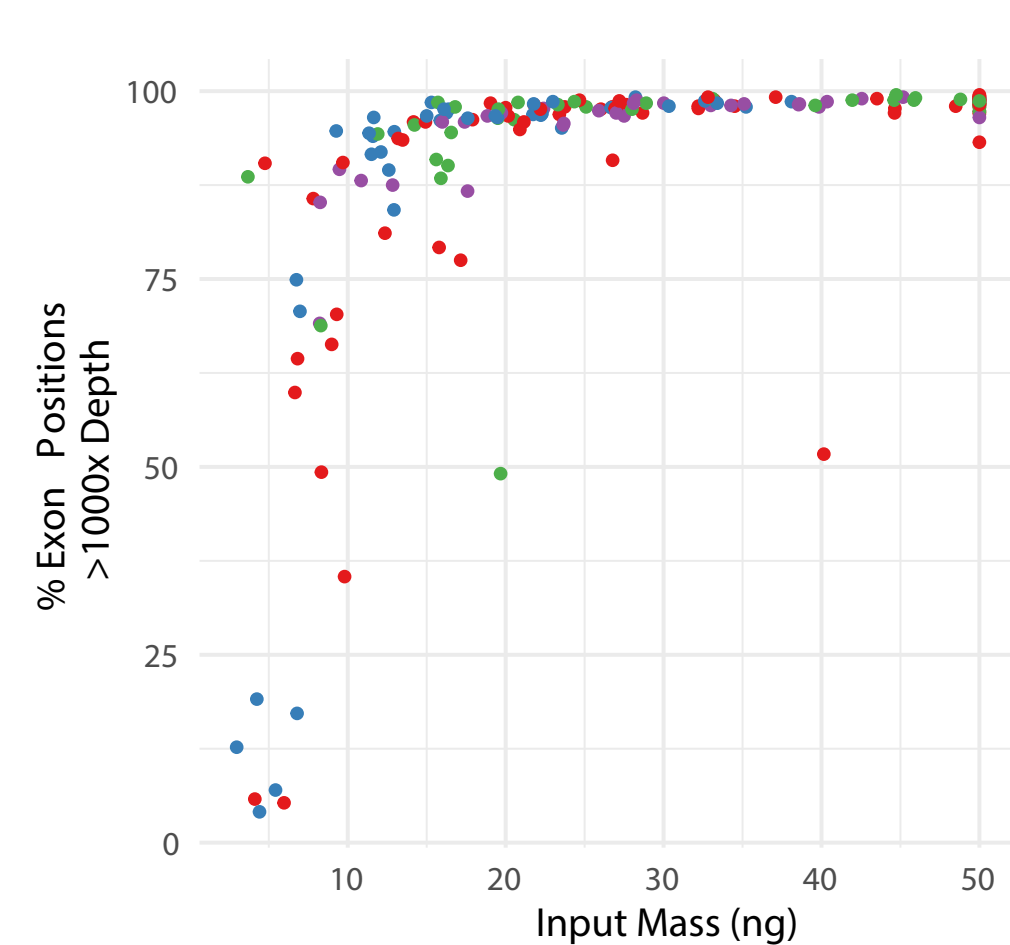

C

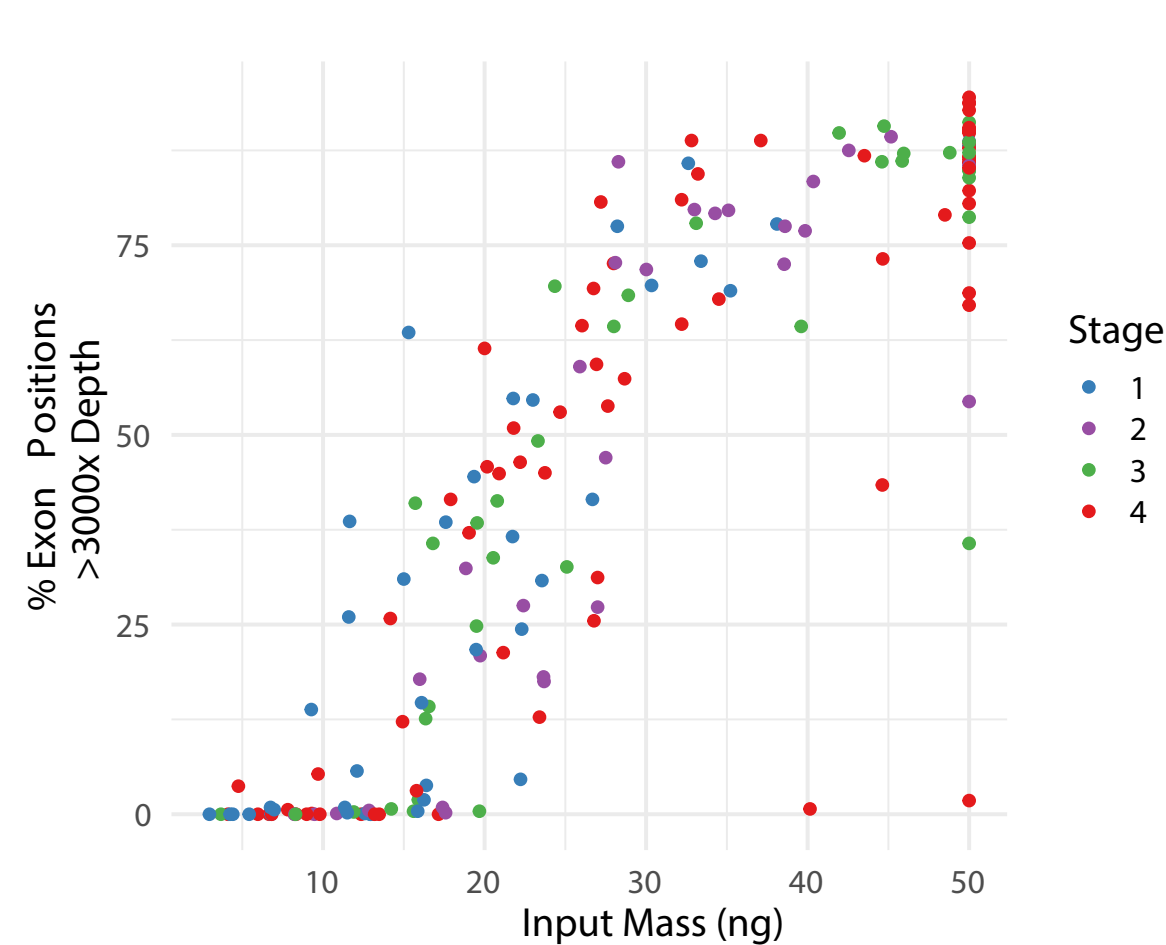

Supplement: jitc-2021-004064supp007.pdf [file jitc-2021-004064supp007.pdf]
